# Supplementary material for: Human-Health and Environmental Risks of Heavy Metal Contamination in Soil and Groundwater at a Riverside Site, China
Source: MDPI journal article supplement (doi:10.3390/pr10101994), 2022-10-02
Supplement: s1 [file s1]

**Table S1.** The risk assessment parameters for As and Cd in soil.

| Parameter                                      | Children              | Adult                 |
|------------------------------------------------|-----------------------|-----------------------|
| Ingr/(mg/day)                                  | 200                   | 100                   |
| Inhr/(m <sup>3</sup> /day)                     | 7.5                   | 15                    |
| EF/(d/a)                                       | 180                   | 180                   |
| ED/a                                           | 7                     | 25                    |
| BW/kg                                          | 16                    | 60                    |
| AT/day                                         | 70 × 365              | ED × 365              |
| PEF/(m <sup>3</sup> /kg)                       | 1.4 × 10 <sup>9</sup> | 1.4 × 10 <sup>9</sup> |
| SA/cm <sup>2</sup>                             | 2800                  | 16,000                |
| SL/(m <sup>3</sup> /cm <sup>2</sup> )          | 0.2                   | 0.2                   |
| ABF                                            | 0.001                 | 0.001                 |
| CF/(kg/mg)or(m <sup>3</sup> /cm <sup>3</sup> ) | 1 × 10 <sup>-6</sup>  | 1 × 10 <sup>-6</sup>  |
| IR <sub>soil+dust</sub> (g/day)                | 0.085                 |                       |
| VR/(m <sup>3</sup> /day)                       | 7                     |                       |
| IR <sub>water</sub> (L/day)                    | 0.59                  |                       |
| C <sub>air</sub> /(ug/m <sup>3</sup> )         | 0.1                   |                       |
| C <sub>water</sub> /(ug/L)                     | 4                     |                       |

**Table S2.** The risk assessment parameters for Pb in soil.

| Parameter                              | Children (7 Years Old) |
|----------------------------------------|------------------------|
| IR <sub>soil + dust</sub> (g/day)      | 0.085                  |
| VR/(m <sup>3</sup> /d)                 | 7                      |
| IR <sub>water</sub> (L/day)            | 0.59                   |
| C <sub>air</sub> /(ug/m <sup>3</sup> ) | 0.1                    |
| C <sub>water</sub> /(ug/L)             | 4                      |
| C <sub>dust, resid</sub> /(μg/g)       | 150                    |
| WF <sub>soil</sub>                     | 0.3                    |
